# 1 **Inferring putative transmission clusters with Phydelyty**

2

3 Alvin X. Han<sup>1,2,3\*</sup>, Edyth Parker<sup>3,4</sup>, Sebastian Maurer-Stroh<sup>1,5</sup> and Colin A. Russell<sup>3\*</sup>

4

5 <sup>1</sup>Bioinformatics Institute, Agency for Science, Technology and Research (A\*STAR), 30

6 Biopolis Street, Singapore 138671

7 <sup>2</sup>NUS Graduate School for Integrative Sciences and Engineering, National University of

8 Singapore (NUS), 21 Lower Kent Ridge, Singapore 119077

9 <sup>3</sup>Laboratory of Applied Evolutionary Biology, Department of Medical Microbiology,

10 Academic Medical Centre, Meibergdreef 9, 1105 AZ Amsterdam-Zuidoost, The Netherlands,

11 <sup>4</sup>Department of Veterinary Medicine, University of Cambridge, Madingley Rd, Cambridge

12 CB3 0ES, United Kingdom

13 <sup>5</sup>Department of Biological Sciences, National University of Singapore, 16 Science Drive 4,

14 Singapore 117558

15

16 \*Corresponding authors: [hanxc@bii.a-star.edu.sg](mailto:hanxc@bii.a-star.edu.sg) or [c.a.russell@amsterdamumc.nl](mailto:c.a.russell@amsterdamumc.nl)

17

18 **Abstract:** Current phylogenetic clustering approaches for identifying pathogen transmission

19 clusters are limited by their dependency on arbitrarily-defined genetic distance thresholds for

20 within-cluster divergence. Incomplete knowledge of a pathogen's underlying dynamics often

21 reduces the choice of distance threshold to an exploratory, ad-hoc exercise that is difficult to

22 standardise across studies. Phydelyty is a new tool for the identification of transmission

23 clusters in pathogen phylogenies. It identifies groups of sequences that are more closely-

24 related than the ensemble distribution of the phylogeny under a statistically-principled and

25 phylogeny-informed framework, without the introduction of arbitrary distance thresholds.

26 Relative to other distance threshold-based and model-based methods, Phydelyty outputs

27 clusters with higher purity and lower probability of misclassification in simulated

28 phylogenies. Applying Phydelyty to empirical datasets of hepatitis B and C virus infections

29 showed that Phydelyty identified clusters with better correspondence to individuals that are

30 more likely to be linked by transmission events relative to other widely-used non-parametric

31 phylogenetic clustering methods without the need for parameter calibration. Phydelyty is

32 generalisable to any pathogen and can be used to identify putative direct transmission events.

33 Phydelyty is freely available at <https://github.com/alvinxhan/Phydelyty>.

34

## 35 **Introduction**

36 Recent advances in high-throughput sequencing technologies have led to the widespread use  
37 of sequence data in infectious disease epidemiology (Gardy and Loman 2017). In particular,  
38 epidemiologically relevant information such as the structure of transmission networks and  
39 infection source identification are increasingly inferred from virus phylogenies, especially  
40 for measurably evolving viral pathogens like HIV-1 and hepatitis C viruses (Ambrosioni et  
41 al. 2012; Bezemer et al. 2015; Matsuo et al. 2017; de Oliveira et al. 2017; Charre et al. 2018).  
42 Non-parametric phylogenetic-based clustering tools operate on the assumption that pathogens  
43 in a transmission cluster are linked by transmission events rapid enough that molecular  
44 evolution between the transmitted pathogens is minimal, and thus genetically more similar  
45 amongst themselves than to the ensemble of input isolates (Prosperi et al. 2011; Ragonnet-  
46 Cronin et al. 2013). This assumption is generally valid for rapidly evolving pathogens such as  
47 RNA viruses as genetic changes between sequences sampled from transmission pairs are  
48 generally low (Campbell et al. 2018).

49

50 Non-parametric phylogenetic clustering methods typically measure the genetic divergence of  
51 sequence pairs either by their genetic distances that are computed from the sequence data  
52 directly (Aldous et al. 2012; Ragonnet-Cronin et al. 2013) or by their patristic distances from  
53 the inferred phylogenetic tree (i.e. the sum of the inferred phylogenetic branch lengths linking  
54 the two sequences; Brenner et al. 2007; Prospero et al. 2011). The divergence of a cluster can  
55 be defined as the median (Prosperi et al. 2011) or largest (Ragonnet-Cronin et al. 2013)  
56 pairwise distance between member sequences of the cluster. To define transmission clusters,  
57 an upper divergence threshold is implemented either as an absolute distance limit (Ragonnet-  
58 Cronin et al. 2013) or as a percentile of the distribution of pairwise sequence distances  
59 (Prosperi et al. 2011). A fundamental limitation of these non-parametric phylogenetic  
60 clustering tools is the need to define this arbitrary absolute transmission cluster divergence  
61 thresholds (termed as ‘cutpoints’ by Villandre et al., 2016). The lack of a consensus  
62 definition of a phylogenetic transmission cluster (Grabowski and Redd 2014) coupled with  
63 incomplete knowledge of a pathogen’s underlying epidemiological dynamics often reduces  
64 the choice of cutpoints to an *ad hoc* exploratory exercise resulting in subjective cluster  
65 definitions.

66

67 Phydely is a novel phylogenetic clustering tool designed to negate the need for arbitrarily  
68 defined cluster divergence thresholds. Requiring only the phylogenetic tree as input,  
69 Phydely infers putative transmission clusters through the identification of groups of  
70 sequences that are more closely-related to one another than the ensemble distribution under a  
71 statistically-principled framework. Phydely, like another phylogenetic clustering tool that  
72 we recently developed, PhyCLIP, is based on integer linear programming (ILP) optimisation  
73 (Han et al. 2019). However, the two clustering tools are substantially different in their  
74 approaches and ILP models such that their clustering results have entirely distinct  
75 interpretations. PhyCLIP uses the divergence information of the entire phylogenetic tree to  
76 inclusively assign statistically-supported cluster membership to as many sequences in the tree  
77 as possible that putatively capture variant ecological, evolutionary or epidemiological  
78 processes. To this end, PhyCLIP is useful for sub-species nomenclature development.  
79 Phydely, on the other hand, exclusively distinguishes closely-related pathogens with  
80 pairwise sequence divergence that are significantly more likely to be drawn from the same  
81 low divergence distribution than that of the ensemble. As such, while PhyCLIP's designated  
82 clusters are underpowered to be interpreted as sequences linked by transmission events,  
83 clusters inferred by Phydely can be interpreted as putative transmission clusters (see  
84 Supplementary Materials).

85

86 To demonstrate the utility of Phydely in identifying putative transmission clusters, the  
87 algorithm underlying Phydely is first presented in detail. The clustering tool is then applied  
88 to both simulated and empirical datasets, including outbreaks of Hepatitis B and C viruses as  
89 well as seasonal A/H3N2 influenza virus infections, and compared against results generated  
90 by existing phylogenetic clustering methods. Phydely is freely available at  
91 <http://github.com/alvinxhan/Phydely>.

92

93 **Method**

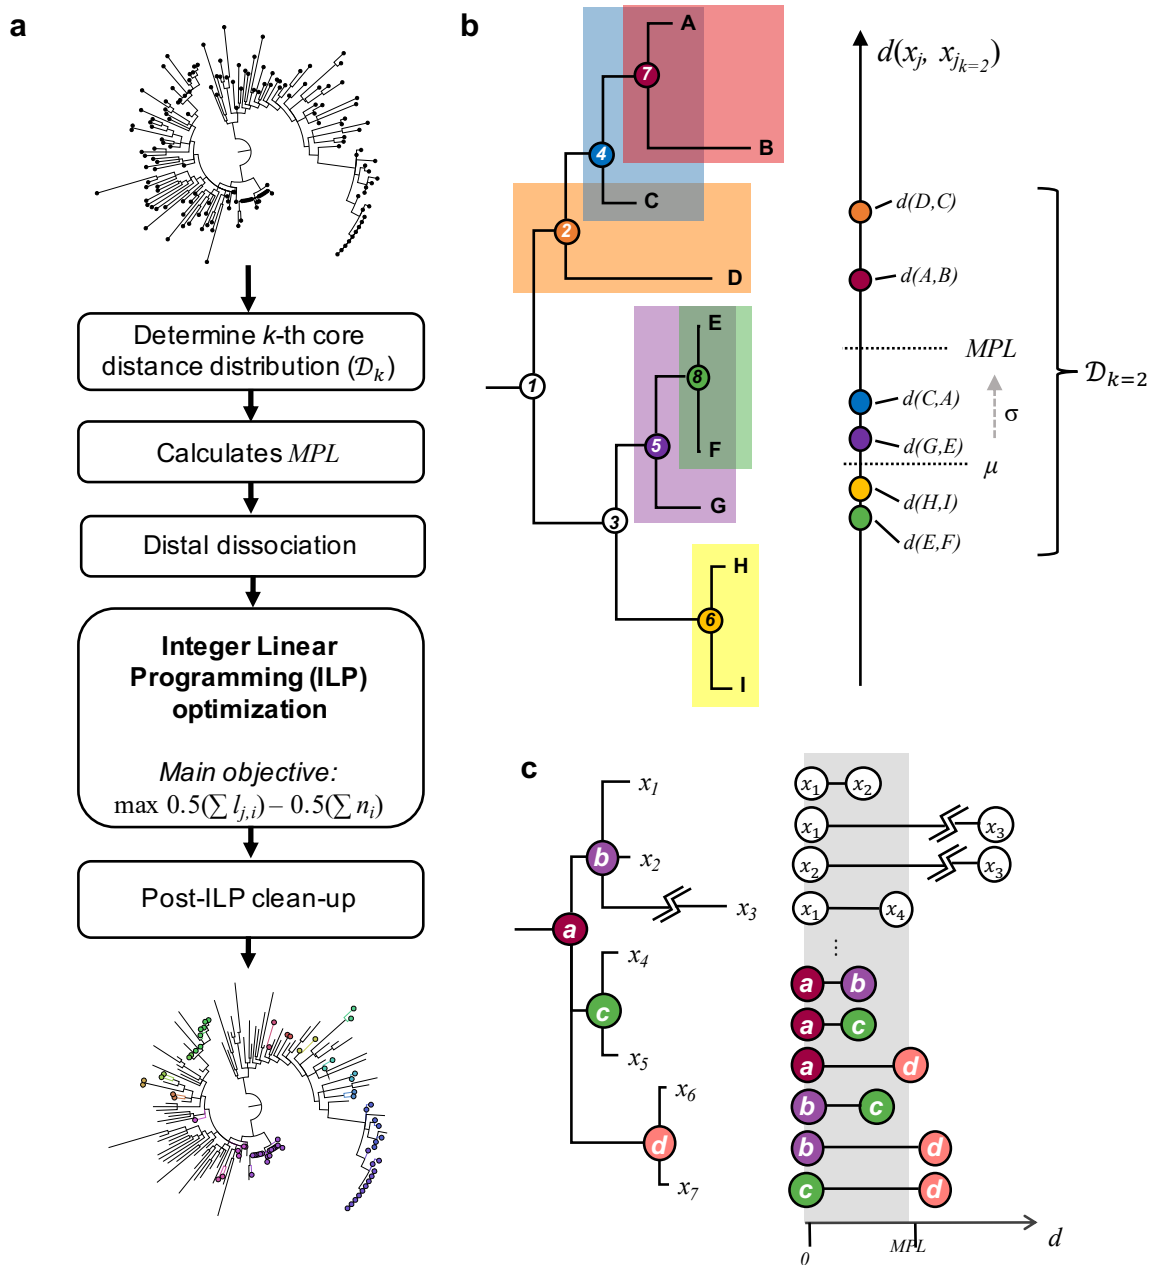

94

95 **Figure 1. (a)** Phydality algorithm pipeline. Phydality considers the input phylogenetic tree as a collection of  
 96 putative clusters each defined by an internal node  $i$  and tips  $j$  that it subtends. The algorithm first infers the  $k$ -th  
 97 core distance distribution ( $\mathcal{D}_k$ ) from the pairwise patristic distances of the closest  $k$ -neighbouring tips.  $k$  can be  
 98 defined by the user or scaled by Phydality to obtain the supremum  $\mathcal{D}_k$  with the lowest divergence.  $\mathcal{D}_k$  is then  
 99 used to compute the maximal patristic distance limit ( $MPL$ ) under which tips are considered to be more closely-  
 100 related than to the ensemble. Dissociation of distally related subtrees/sequences (Figure 1c) ensues such that  
 101 both monophyletic and paraphyletic clustering structures can be identified. Phydality then incorporates the  
 102 distance and topological information of the remaining nodes and tips into an integer linear programming (ILP)  
 103 model to be optimised by clustering all tips that satisfy the relatedness constraints within the least number of  
 104 clusters. Finally, post-ILP steps are implemented to remove any tips that may have been spuriously clustered.  
 105 **(b)** Determination of the maximal patristic distance limit ( $MPL$ ) using the median ( $\mu$ ) and robust estimator of  
 106 scale ( $\sigma$ ) based on the  $k$ -th core distance distribution ( $\mathcal{D}_k$ ) of every sequence  $x_j$  and its  $k$ -closest neighbours  
 107 ( $d(x_j, x_{j+k})$ ;  $k=2$  in this case as shown by the pairs of sequences highlighted with distinct colours). **(c)** Distal

108 dissociation of a putative transmission cluster subtended by internal node  $a$ . If a sequence tip has a pairwise  
109 sequence distance that is greater than  $MPL$ , it will be dissociated and not be clustered under the internal node of  
110 interest (i.e. internal node  $a$ ). In this case, sequence  $x_3$  is dissociated from the putative cluster  $a$  due to its  
111 exceedingly long branch length violating the  $MPL$  threshold (i.e.  $d(x_3, x_{3k}) > MPL$ ). Additionally, whole  
112 subtrees subtended by the internal node of interest will be dissociated if any of its inter-nodal patristic distance  
113 exceeds  $MPL$ . Here, subtree  $d$  and its descending sequences (i.e.  $x_6$  and  $x_7$ ) will be dissociated from  $a$  as its  
114 inter-nodal distances with internal nodes  $b$  and  $c$  are both larger than  $MPL$ .

115

### 116 *Clustering Algorithm*

117 Figure 1(a) shows the overall workflow of Phydelity. First, Phydelity considers the input  
118 phylogeny as an ensemble of putative clusters, each consisting of an internal node  $i$  and the  
119 leaves it subtends. The within-cluster diversity of node  $i$  is measured by its mean pairwise  
120 patristic distance ( $\mu_i$ ). The patristic distance between two nodes, which can be any sequence  
121 tips or internal nodes in the phylogeny, refers to the sum of branch lengths linking those two  
122 nodes. Sequences subtended by  $i$  (i.e. all descendant tree tips of node  $i$ ) are considered for  
123 clustering if  $\mu_i$  is less than the maximal patristic distance limit ( $MPL$ ), under which  
124 sequences are considered more closely-related to one another than the ensemble distribution  
125 (Figure 1b).

126

127 Phydelity computes the  $MPL$  by first calculating the pairwise patristic distance distribution  
128 of closely-related tips comprising the pairwise patristic distances of sequence  $x_j$  to the closest  
129  $k$ -neighbouring tips (i.e.  $d(x_j, x_{j_k}) = d_l$ ) wherein their closest  $k$ -neighbours include sequence  
130  $x_j$  as well (i.e. the  $k$ -th core distance distribution,  $\mathcal{D}_k$ ; Figure 1b). Additionally,  $\mathcal{D}_k$  is  
131 incrementally sorted ( $d_l \leq d_{l+1}$ ) and truncated up to  $d_L$  if the common log difference  
132 between  $d_L$  and  $d_{L+1}$  is more than zero:

$$133 \quad \mathcal{D}_k = \left\{ d_1, \dots, d_l, d_{l+1}, \dots, d_L \mid d_l \leq d_{l+1}, \lg\left(\frac{d_{l+1} - d_l}{d_l}\right) \leq 0 \right\}$$

134 The user can opt to either input the desired  $k$  parameter or allow Phydelity to automatically  
135 scale  $k$  to the value that yields the supremum  $k$ -th core distance distribution with the lowest  
136 overall divergence (i.e. the largest possible  $k$  that still yields the lowest overall divergence  
137 between  $k$ -neighbouring tips). This is done by testing if  $\mathcal{D}_{k+1}$  and  $\mathcal{D}_k$  are statistically distinct  
138 ( $p < 0.01$ ) using the Kuiper's test (see Supplementary Materials). All clustering results of  
139 Phydelity presented in this work were generated using the autoscaled value of  $k$ .

140

141 The  $MPL$  is then calculated by:

$$142 \quad MPL = \bar{\mu} + \sigma$$

143 where  $\bar{\mu}$  is the median pairwise distance of  $\mathcal{D}_k$  and  $\sigma$  is the corresponding robust estimator of  
144 scale without assuming symmetry about  $\bar{\mu}$  using the Qn method (see Supplementary  
145 Materials, Rousseeuw and Croux 1993; Figure 1b).

146

147 This is then followed by dissociation of distantly-related descendant subtrees/sequences to all  
148 putative nodes for clustering, thereby facilitating identification of both monophyletic as well  
149 as nested paraphyletic clusters (Figure 1c; see Supplementary Materials). Phydely filters  
150 outlying tips from putative clusters under the assumption that viruses infecting individuals in  
151 a transmission chain coalesce to the same most recent common ancestor (MRCA).

152 Additionally, Phydely requires any clonal ancestors in between the MRCA and tips of a  
153 putative cluster to be as genetically similar to each other as they are to the tips of the cluster.

154 As such, for a putative transmission cluster, the mean pairwise nodal distance between all  
155 internal and tip nodes of a cluster must also be  $\leq MPL$  (Figure 1c).

156

157 An ILP model is implemented and optimised under the objective to assign cluster  
158 membership to sequences satisfying the aforementioned relatedness criteria within the least  
159 number of clusters. In other words, Phydely uses ILP optimisation to search for the  
160 clustering configuration that favours the designation of larger clusters of closely-related  
161 sequences which are likely linked by transmission events. Any topologically outlying  
162 singletons that were spuriously clustered are removed. Finally, it is important to note that a  
163 transmission cluster identified by Phydely should only be interpreted as a fully connected  
164 network of likely transmission pairs without implying any underlying transmission  
165 directionality. The full algorithm description and mathematical formulation of Phydely is  
166 detailed in the Supplementary Materials.

167

### 168 *Assessing clustering results of simulated epidemics*

169 Phydely was evaluated on phylogenetic trees derived from simulated HIV epidemics of a  
170 hypothetical men who have sex with men (MSM) sexual contact network (C-type networks in  
171 Villandre *et al.*, 2016). The simulated sexual contact network comprised 100 subnetworks  
172 (communities) sampled from an empirical distribution obtained from the Swiss HIV Cohort  
173 Study. All communities were linked in a chain initially and additional connections between  
174 any two communities were generated at a probability of 0.00075. Subjects in the network  
175 could either be in the “susceptible”, “infected” or “removed” (i.e. individual was diagnosed

176 and sampled) state. Transmission clusters were attributed to sexual contact among individuals  
177 belonging to the same community.

178

179 300 epidemics were simulated for four different weights of inter-community transmission  
180 rates ( $w = 25\%$ ,  $50\%$ ,  $75\%$  or  $100\%$  of the within-community rate). Two infected individuals  
181 were randomly introduced in any of the 100 communities. Transmission time along an edge  
182 followed an exponential distribution with rates directly proportional to the associated  
183 weights. Time until removal was based on a shifted exponential distribution with the shift  
184 representing the minimum amount of time required for a virus to be transmitted to susceptible  
185 neighbours. The simulation ended once 200 individuals were in the “removed” state.

186

187 These simulated datasets were tested by Villandre *et al.* (2016) to compare the outputs of four  
188 “cutpoint-based” phylogenetic clustering methods where the arbitrary distance threshold  
189 defining a transmission cluster (i.e. cutpoint) was computed as the: (i) absolute patristic  
190 distance threshold between any two tips (Brenner *et al.* 2007); (ii) standardised number of  
191 nucleotide changes (i.e. ClusterPicker, Ragonnet-Cronin *et al.*, 2013); (iii) percentile of the  
192 phylogeny’s pairwise sequence patristic distance distribution (i.e. PhyloPart, Prosperi *et al.*,  
193 2011) and (iv) height of an ultrametric tree obtained using the weighted pair-group method of  
194 analysis (WPGMA). For each method, Villandre *et al.* varied the corresponding cutpoint  
195 parameter over an equivalent range of thresholds. Comparing the output clusters generated by  
196 the four methods at their respective optimal cutpoint by adjusted rand index (see below), it  
197 was found that the WPGMA method tended to produce clusters with better correspondence to  
198 the underlying sexual contact structure. As such, clustering results from Phydelyity were  
199 compared to those obtained by Villandre *et al.* using the WPGMA method. Additionally,  
200 Phydelyity was also compared to the multi-state birth-death (MSBD) method which inferred  
201 transmission clusters on the same simulated datasets by detecting significant changes in  
202 transmission rates (Barido-Sottani *et al.* 2018).

203

204 To assess and compare the output clusters from Phydelyity and the aforementioned clustering  
205 methods that had been tested on these networks previously, several metrics were used to  
206 measure how well the clustering results corresponded with the known sexual contact  
207 network:

- 208 i. Adjusted rand index (*ARI*). *ARI* measures the accuracy of the clustering results by  
209 computing the frequencies of pairs of sequences of the identical (or distinct)  
210 subnetwork(s) assigned to the same (or different) cluster(s) (Hubert and Arabie 1985).  
211 *ARI* ranges between -1 (matching between output clusters and community labels is  
212 worse than random clustering) and 1 (perfect match between output clusters and ground  
213 truth).
- 214 ii. Modified Gini index ( $I_G$ ). Gini impurity, commonly used in decision tree learning,  
215 refers to the probability of a randomly selected item from a set of classes being  
216 incorrectly labelled if it was randomly labelled by the distribution of occurrences in the  
217 class set (Breiman et al. 1984). Here,  $I_G$  measures how often a randomly selected  
218 sequence from the given network would be incorrectly clustered by the inferred  
219 clusters. For a sexual contact network with  $T$  communities (i.e.  $t \in \{1, 2, \dots, T\}$ ),  $I_G$  is  
220 computed as:

$$I_G = \sum_{t=1}^T \left[ p_t \left( 1 - \sum_{c=1}^{C^*} p(c|t) \right) \right]$$

221  
222 where  $C^*$  is the set of clusters defined to have correctly classified sequences attributed  
223 to community  $t$  (i.e. any cluster that constitutes the largest proportion of sequences  
224 from community  $t$  at both the cluster and the community label levels),  $p_t$  is the  
225 probability of sequence from community  $t$  and  $p(c|t)$  refers to the probability that a  
226 sequence is clustered under cluster  $c$  conditional of it being from community  $t$ . If  
227 output clusters perfectly align with the underlying sexual contact network (i.e. one  
228 cluster only constitute one class of community),  $I_G = 0$ . Conversely, if clustering  
229 results are completely random,  $I_G = 1$ .

- 230 iii. Purity measures the average extent that the output clusters contain only a single class  
231 (i.e. a particular sexual contact community; Manning et al. 2008):

$$Purity = \sum_{c=1}^C \frac{1}{N_c} \left( \frac{\max_t \{N_{c,t}\}}{N_c} \right)$$

232  
233 where  $N_c$  is the size of cluster  $c$ ,  $N_{c,t}$  is the number of tips from community  $t$  clustered  
234 under cluster  $c$  and  $C$  is the set of all output clusters. Note that purity (as well as  $I_G$ )  
235 can be inflated if the total number of clusters is large (i.e. if each tip is assigned to a  
236 unique cluster, purity = 1 and  $I_G = 0$ ).



237 iv. Normalised mutual information (*NMI*) trades off the output clustering quality against  
238 the number of clusters (Manning et al. 2008):

$$239 \quad NMI = \frac{I(T, C)}{[H(T) + H(C)]/2}$$

240 where  $H(T)$  and  $H(C)$  are the respective entropies of the network communities and  
241 output clusters, and  $I(T, C)$  is the mutual information between them. If clustering is  
242 random with respect to the network community labels,  $I(T, C) = 0$  (i.e.  $NMI = 0$ ).  
243 On the other hand, maximum mutual information is achieved (i.e.  $I(T, C) =$   
244  $I(T, C)_{max}$ ) either when the output clusters map the sexual contact network perfectly  
245 or all clusters have one member only. Hence, to penalise large cardinalities (i.e.  
246 number of members in a cluster) while normalising  $I(T, C)$  between 0 and 1, *NMI* is  
247 calculated since (a) entropy increases with increasing number of clusters and (b)  
248  $[H(T) + H(C)]/2$  is a tight upper bound to  $I(T, C)$ .

249

#### 250 *Empirical datasets*

251 Phydelyty was also tested on three empirical datasets – acute hepatitis C virus infections  
252 among men who have sex with men (Charre et al. 2018), hepatitis B viruses collected from  
253 members of the same families (Matsuo et al. 2017) as well as A/H3N2 influenza viruses  
254 collected from a community-based cohort of households during the 2014/2015 season  
255 (McCrone et al. 2018). All phylogenetic trees were reconstructed using RAxML (v8.2.12)  
256 under the GTRGAMMA model (Stamatakis 2014).

257

#### 258 *Comparisons to ClusterPicker and PhyloPart*

259 ClusterPicker (Ragonnet-Cronin et al. 2013) and PhyloPart (Prosperi et al. 2011), two non-  
260 parametric phylogenetic clustering tools that are methodologically comparable to Phydelyty,  
261 were also applied to the hepatitis C and hepatitis B virus datasets for comparisons. Either  
262 clustering tool has been previously applied to multiple studies involving different pathogens  
263 (Prosperi et al. 2011; Jacka et al. 2014; Bezemer et al. 2015; Bartlett et al. 2016; Coll et al.  
264 2017; de Oliveira et al. 2017; Charre et al. 2018). Other than the phylogenetic tree, both  
265 ClusterPicker and PhyloPart also require users to input an arbitrarily-defined genetic distance  
266 threshold (as an absolute distance limit for ClusterPicker and percentile of the global pairwise  
267 patristic distance for PhyloPart). As such, a range of distance limits (PhyloPart: 0.5-10<sup>th</sup>

268 percentile; ClusterPicker: 0.005-0.1 nucleotide/site) were applied to both tools. No bootstrap  
269 support threshold were implemented for comparability to Phydely.

270

271 The lowest optimal threshold for the distance range tested was found by maximisation of the  
272 mean silhouette index (*SI*) for both ClusterPicker and PhyloPart. The Silhouette index  
273 measures how similar an item is to members of its own cluster as opposed to the nearest  
274 neighbouring clusters - i.e. a larger mean silhouette index indicates that items of the same  
275 cluster are more closely related amongst themselves than to its neighbours (Rousseeuw,  
276 1987). No parameter optimisation was required for Phydely.

277

## 278 **Results**

### 279 *Simulated HIV epidemics*

280 Phydely was applied to simulated HIV epidemics among men who have sex with men  
281 (MSM) belonging to a hypothetical sexual contact network structures where transmission  
282 clusters were attributed to transmission by sexual contact among individuals belonging to the  
283 same subnetwork (see Methods; Villandre *et al.*, 2016). These simulations were originally  
284 used to assess the performance of “cutpoint-based” clustering tools, including ClusterPicker,  
285 PhyloPart as well as the weighted pair-group method of analysis (WPGMA) which generally  
286 attained the highest adjusted rand-index (ARI) score across all simulations when calibrating  
287 their respective cutpoint thresholds against the ground-truth. Phylogenetic trees generated  
288 from these simulations were also tested by the multi-state birth death (MSBD) method  
289 (Barido-Sottani *et al.* 2018).

290

291 Clustering results from Phydely were compared to outputs from the MSBD method and  
292 those from the WPGMA method achieving the best ARI scores. The purity, modified Gini  
293 index ( $I_G$ ) and normalised mutual information (*NMI*) measures were also used to provide a  
294 more comprehensive assessment of the clustering results (Figure 2, Supplementary Figure 3  
295 and Supplementary Table 1; see Methods).

296

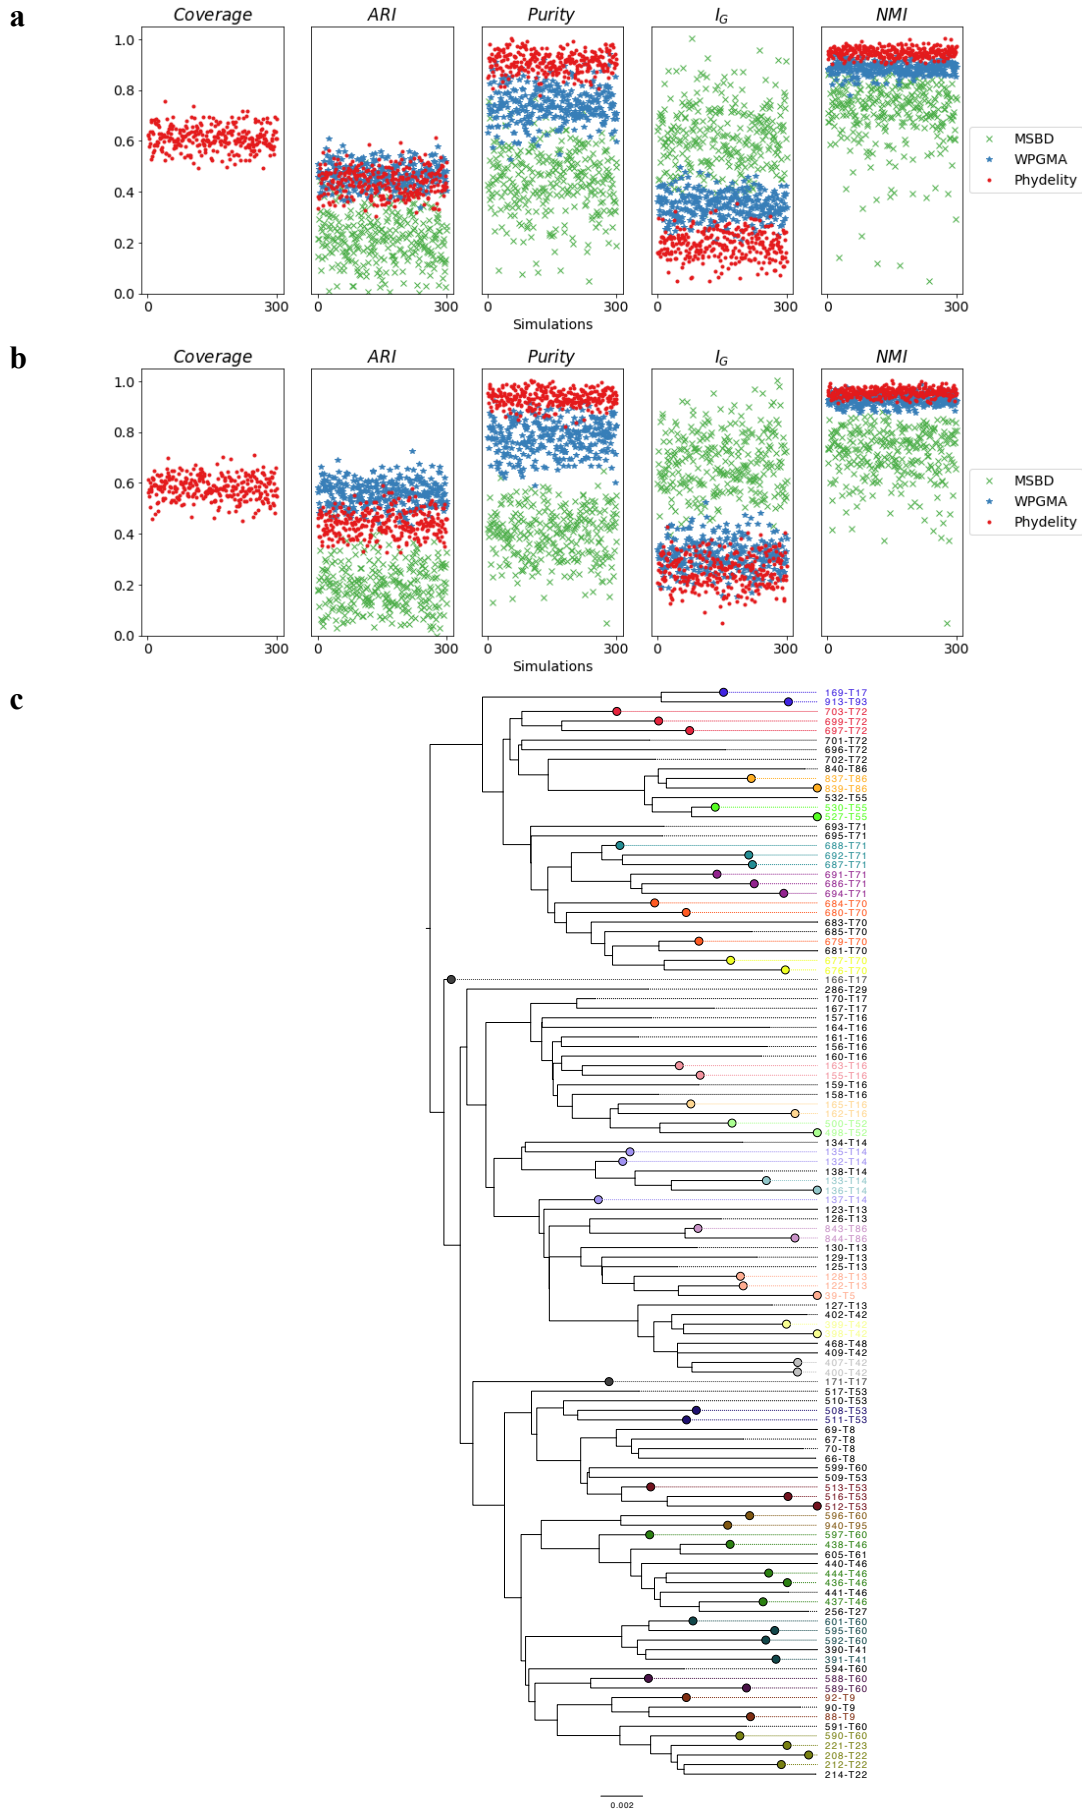

297 **Figure 2.** Clustering results of simulated HIV epidemics in a hypothetical MSM sexual contact network. **(a)**  
298 Clustering metrics for clustering algorithms (Phydelity, weighted pair-group method of analysis (WPGMA) and  
299 multi-state birth death (MSBD) methods) applied simulated phylogenies with inter-communities transmission  
300 rates weighted at half of within-community rates (i.e.  $w = 0.5$ ). Coverage refers to the proportion of tips  
301 clustered by Phydelity. Adjusted rand index (*ARI*) measures how accurate the output clusters corresponded with  
302 the community labels. *Purity* gives the average extent clusters contain only a single class of community.  
303 Modified Gini index ( $I_G$ ) is the probability that a randomly selected sequence would be incorrectly clustered.  
304 Normalised mutual information (*NMI*) accounts for the trade-off between clustering quality and number of  
305 clusters. **(b)** Results for simulations where inter-communities transmission rates were identical to within-  
306 community rates (i.e.  $w = 1.0$ ). **(c)** Sample output clusters of Phydelity for a subtree of an example simulation ( $w$   
307 = 0.5). Tips that were clustered by Phydelity are distinctly coloured according to their cluster membership. By  
308 relaxing the monophyletic assumption, Phydelity is capable of detecting paraphyletic clusters (e.g. transmission  
309 pair 166-T17 and 171-T17 and cluster subtending 132-T14, 135-T14 and 137-14).

310

311 The phylogenetic trees generated from the simulations had a large number of clusters that  
312 were relatively small in size (i.e. percentage of sequences that were part of ground truth  
313 clusters with sizes  $< 8$  tips = 33.9% (weight of inter-community transmission rates,  $w =$   
314 25%); 55.5% ( $w = 100\%$ ); see Barido-Sottani *et al.* (2018) for more details). Furthermore,  
315 these ground truth clusters were not all monophyletic (Figure 2c). As a result, while  
316 Phydelity and WPGMA yielded comparable ARI scores (Phydelity: 0.44-0.45 (s.d. = 0.05);  
317 WPGMA: 0.44-0.56 (s.d. = 0.05-0.05); Supplementary Table 1), Phydelity's output clusters,  
318 which allows paraphyletic clusters (Figure 2c), are substantially purer (mean purity;  
319 Phydelity: 0.81-0.88 (s.d. = 0.03); WPGMA: 0.67-0.74 (s.d. = 0.06-0.06)) and have a lower  
320 probability of misclassification when compared to WPGMA which assumes clusters are  
321 strictly monophyletic (mean  $I_G$ ; Phydelity: 0.27-0.28 (s.d. = 0.04-0.05); WPGMA: 0.33-0.40  
322 (s.d. = 0.04-0.05)). Coverage of sequences clustered by Phydelity lies between 58.2% and  
323 61.6%.

324

325 The clustering results from WPGMA presented in this work were based on the optimal  
326 distance threshold derived by calibration against the simulated ground-truth. Notably,  
327 Phydelity's auto-scaling mitigates the need for threshold calibration and enables application  
328 to empirical datasets where ground truth clustering is unavailable, as is typically the case for  
329 epidemiological studies.

330

### 331 *Hepatitis B virus transmission between family members*

332 Phydelity was tested on empirical datasets to demonstrate its applicability on real-world data,  
333 including hepatitis B viruses (HBV) collected from residents in the Binh Thuan Province of  
334 Vietnam (Matsuo *et al.* 2017). In such highly endemic regions, HBV is commonly

335 transmitted either vertically from mothers to children during the perinatal period or  
336 horizontally between cohabitants of the same household (Matsuo et al. 2017). As complete  
337 genome nucleotide sequences were not available for all individuals, a phylogenetic tree was  
338 reconstructed using the viral polymerase sequences collected from 41 patients, of which 12 of  
339 them were confirmed to be members of three families (i.e. denoted as F2, F3 and F4) by a  
340 family survey as well as mitochondrial analyses. Besides Phydelity, the resulting phylogeny  
341 was also implemented in ClusterPicker and PhyloPart.

342

343 Phydelity identified three likely transmission clusters that distinguish between the separate  
344 family households (Figure 3). At their respective optimal distance thresholds by mean  
345 Silhouette index (see Methods), ClusterPicker and PhyloPart achieved similar clustering  
346 results. Importantly, Phydelity was able to obtain the same optimal clustering results without  
347 optimisation and implementation of a hard-to-interpret distance parameter.

348

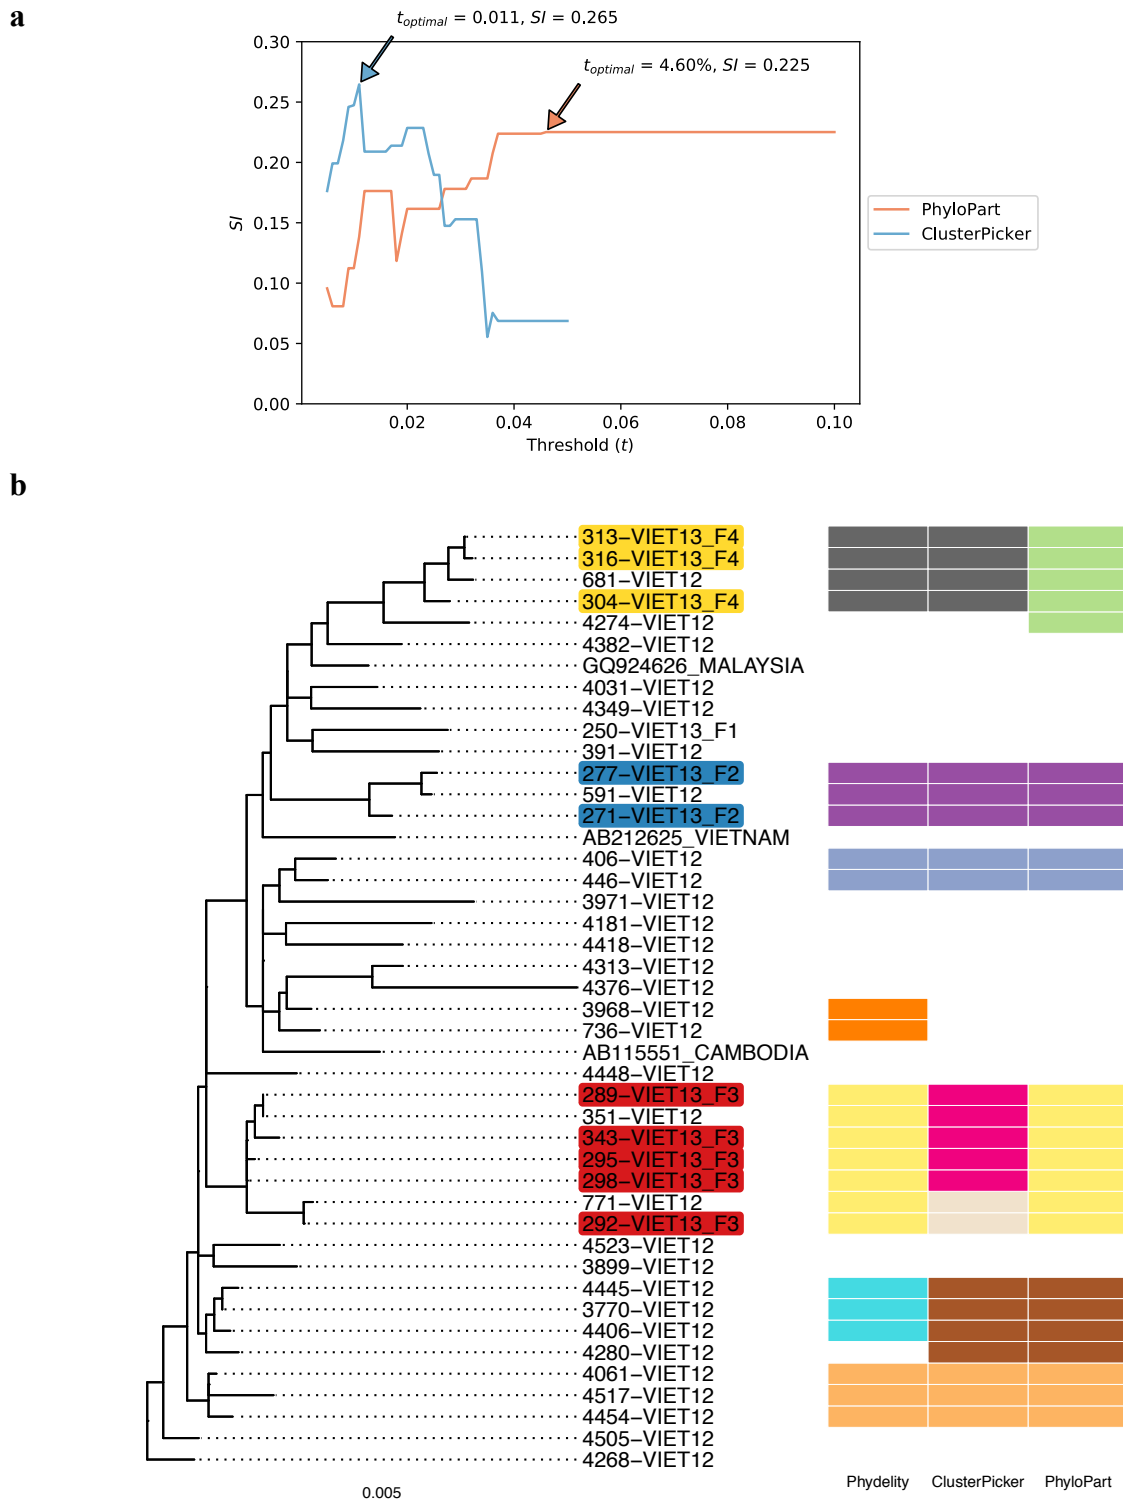

349 **Figure 3.** Clustering results of hepatitis B viruses (HBV) collected from residents in the Binh Thuan Province  
 350 of Vietnam. **(a)** Plots of mean Silhouette index (*SI*) computed for the range of genetic distance thresholds  
 351 implemented in ClusterPicker and PhyloPart. Clustering results from the lowest optimal distance threshold  
 352 ( $t_{optimal}$ ) with the highest *SI* value for each method were compared to Phylidity as depicted in **b** (ClusterPicker:  
 353  $t_{optimal} = 0.011$  nucleotide/site,  $SI = 0.265$ ; PhyloPart:  $t_{optimal} = 4.60\%$ ,  $SI = 0.225$ ). Plot for ClusterPicker is  
 354 truncated at  $\sim 0.05$  nucleotide/site as the entire tree collapsed to single cluster after this threshold. **(b)** Maximum  
 355 likelihood phylogeny of HBV polymerase sequences derived from viruses collected from 41 patients. 12

356 patients were confirmed to be members of three separate family households (F2, F3 and F4; tip names shaded  
357 with a distinct colour for each family). Clustering results from Phydelyity are depicted as a heatmap alongside  
358 outputs from ClusterPicker and PhyloPart based on their respective  $t_{optimal}$ . Each distinct colour of the heatmap  
359 cells denotes a different cluster.

360

### 361 *Hepatitis C virus transmission among MSM*

362 Incidence of HCV infections among HIV-negative MSM has been relatively limited as  
363 compared to their HIV-positive counterparts. However, the recent uptake of pre-exposure  
364 prophylaxis (PrEP) among HIV-negative individuals to prevent HIV infection could pose  
365 higher risk of sexually transmitted HCV infections (Volk et al. 2015; Charre et al. 2018). In a  
366 study on HIV-positive and HIV-negative MSM patients in Lyon, 108 cases of acute HCV  
367 infections (80 primary infections; 28 reinfections) were reported between 2014 and 2017  
368 among 96 MSM (72 HIV-positive; 24 HIV-negative, of which 16 (67%) of them were on  
369 PrEP; Charre et al. 2018). Separate phylogenetic analyses were performed on a subset of 89  
370 (68 HIV-positive; 21 HIV-negative) HCV isolates belonging to genotypes 1a and 4d based on  
371 their NS5B sequences. Additionally, 25 HCV sequences from HIV-infected MSM collected  
372 before 2014 were included along with 60 control HCV sequences derived from HIV-  
373 negative, non-MSM patients residing in the same geographical area as controls. All  
374 sequences collected from MSM patients were given strain names in the format of  
375 “MAH(ID)\_accession” while control sequences from non-HIV, non-MSM patients were  
376 denoted as “NCH(ID)\_accession” (Figure 4). Phydelyity as well as ClusterPicker and  
377 PhyloPart were applied to the reconstructed phylogenies, with the latter calibrated over a  
378 range of distance thresholds. Again, only clustering results based on the lowest distance  
379 threshold maximising the mean Silhouette index for ClusterPicker and PhyloPart were  
380 compared to Phydelyity’s output clusters (see Methods).

381

382 Generally, membership of the MSM transmission clusters and pairs identified by Phydelyity  
383 across both genotypes were strictly limited to sequences derived from MSM patients.  
384 Relaxing the monophyletic assumption by dissociating distantly-related tips from putative  
385 monophyletic clusters (see Methods) enables Phydelyity to identify likely outlying sequences  
386 as evidenced by their relatively longer branch lengths from the cluster ensemble (Table 1 and  
387 Figure 4; Genotype 1a: cluster C1 – MAH66 and cluster C3 – MAH31, MAH62 and  
388 MAH72; Genotype 4d: cluster C3 – MAH24 and MAH08). In particular, for genotype 1a,  
389 even though the mean pairwise distance of MAH72 to members of cluster C3 is within a  
390 standard deviation of the latter’s within-cluster diversity, its distance to the more distant

391 members (e.g. MAH15 and MAH40, Figure 4) violated the inferred *MPL* (Table 1).  
 392 Additionally, as a result of distal dissociation, Phydelyty distinguishes clusters that are  
 393 genetically more alike amongst themselves than to those phylogenetically ancestral to it (e.g.  
 394 cluster C1.1 that is “nested” within cluster C1 for genotype 1a; Figure 4a).

395  
 396 For both genotypes, Phydelyty found multiple clusters that included both HIV-positive and  
 397 HIV-negative MSM patients (i.e. Genotype 1a: clusters C2 and C3, Figure 4a; Genotype 4d:  
 398 clusters C2 and C2.2, as well as pair P2, Figure 4b). While it is not clear which of the HIV-  
 399 negative patients were on PrEP (information not supplied in the original paper), the clustering  
 400 results from Phydelyty were in line with the findings by Charre *et al.* that acute HCV  
 401 infections among HIV-negative MSM were likely sourced from their HIV-positive  
 402 counterparts.

403  
 404 While ClusterPicker managed to consolidate all of the MSM genotype 4d sequences into a  
 405 single monophyletic cluster (Figure 4b), its clustering of genotype 1a was problematic as a  
 406 large number of non-MSM control sequences were clustered together with those from MSM  
 407 patients (Figure 4a). PhyloPart’s optimal clustering output was consistent Phydelyty’s for  
 408 genotype 1a. However, the larger number of identical sequences in the genotype 4d tree  
 409 skewed the optimal distance parameter (expressed as  $x$ -th percentile of the pairwise patristic  
 410 distribution of the entire phylogeny) to only cluster these identical sequences.

411

| Genotype | MPL   | Cluster | Mean pairwise patristic distance of cluster ( $\sigma$ ) | Outlier | Mean pairwise patristic distance of outliers to cluster members ( $\sigma$ ) |
|----------|-------|---------|----------------------------------------------------------|---------|------------------------------------------------------------------------------|
| 1a       | 0.029 | C1      | 0.011 (0.012)                                            | MAH66   | 0.043 (0.009)                                                                |
|          |       | C3      | 0.016 (0.009)                                            | MAH62   | 0.045 (0.027)                                                                |
|          |       |         |                                                          | MAH31   | 0.041 (0.025)                                                                |
|          |       |         |                                                          | MAH72   | 0.022 (0.015)                                                                |
| 4d       | 0.010 | C1      | 0.006 (0.004)                                            | MAH24   | 0.019 (0.006)                                                                |
|          |       |         |                                                          | MAH08   | 0.009 (0.005)                                                                |

412 **Table 1:** Comparing the genetic distance between outlying tips and the clusters they coalesce to with the  
 413 genetic diversity of those clusters.



a.

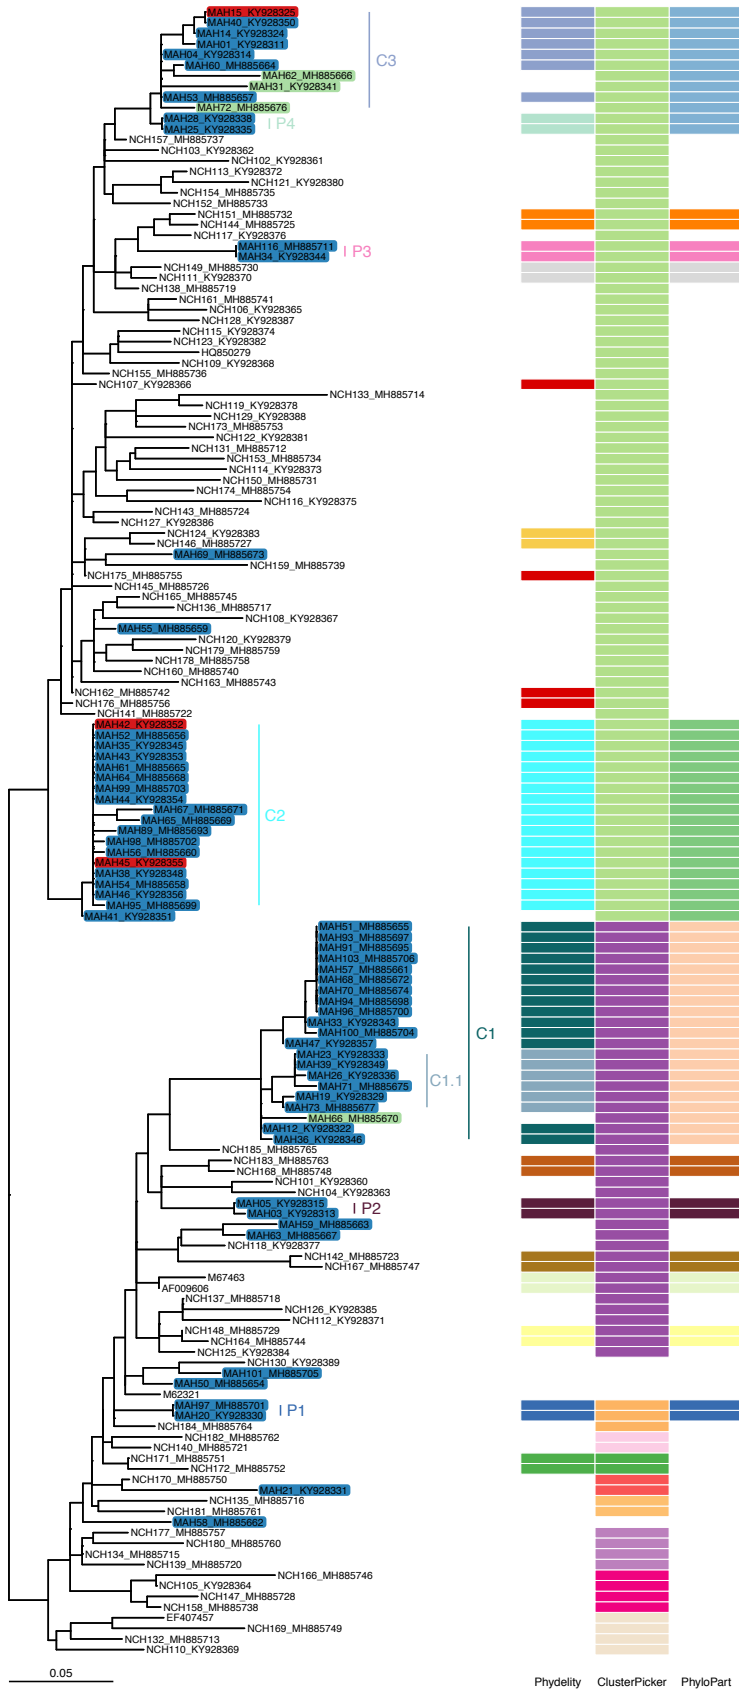

b.

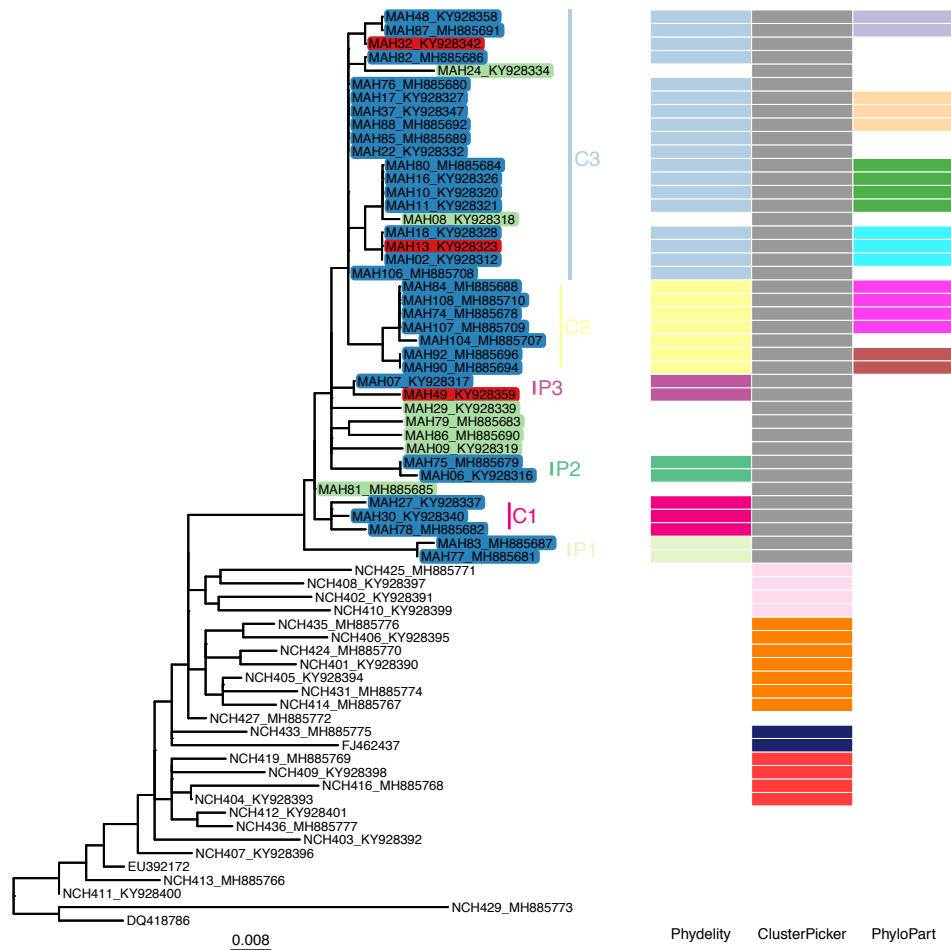

414 **Figure 4.** Maximum likelihood phylogeny and clustering results of hepatitis C viruses (HCV) obtained from  
 415 men who have sex with men (MSM) in Lyon, France. All highlighted tip names denoted in the format  
 416 “MAH(ID)\_accession” were samples from MSM patients (blue: HIV-positive, red: HIV-negative, green: HIV-  
 417 positive and considered as outlying sequences by Phydelyty). Non-highlighted tips were collected from non-  
 418 HIV, non-MSM patients residing in the same geographic region and time period. Clustering results from  
 419 Phydelyty, ClusterPicker and PhyloPart are depicted as a heatmap. Each distinct colour refers to a different  
 420 cluster. Similar to the Vietnamese hepatitis B empirical viral datasets (Figure 3a and Supplementary Figure 4),  
 421 mean Silhouette index was used as the optimality criterion to determine the optimal absolute distance threshold  
 422 for ClusterPicker and PhyloPart. Only results based on the optimised thresholds are shown here for  
 423 ClusterPicker and PhyloPart. No parameter optimisation is required for Phydelyty. **(a)** Genotype 1a. **(b)**  
 424 Genotype 4d.

425

426

427 *Seasonal A/H3N2 influenza virus infections within a community and the effects of sampling*  
428 Phydelity was also applied to A/H3N2 influenza viruses collected from a community-based  
429 cohort of 340 households (1431 participants) in Southeastern Michigan, U.S. during the  
430 2014/2015 season (McCrone et al. 2018). Of the influenza positive cases, 206 virus samples  
431 were collected from 166 individuals that belonged to 81 households and sequenced. As  
432 concurrent infections among individuals within the same household do not necessarily imply  
433 transmission, McCrone et al. implemented stringent epidemiological as well as genetic  
434 distance constraints to identify transmission pairs: (i) the donor and recipient of a  
435 transmission pair were of the same household with onset of illness symptoms occurring  
436 within 7 days of each other, with the donor having the earlier symptom onset date; (ii) there  
437 must be no other potential donors with the same symptom onset date; (iii) symptom onset  
438 dates of donor and recipient should not be on the same day unless they were index cases; and  
439 (iv) genetic distance between the within-host viral populations of donor and recipient must be  
440 below the 5<sup>th</sup> percentile of the distance distribution of random pairs of infected individuals  
441 from the community (McCrone et al. 2018). In total, 50 virus isolates constituting 32 high-  
442 quality transmission pairs were identified. Consolidating transmission pairs with overlapping  
443 donors and recipients into clusters, there were 22 genetically-validated transmission clusters,  
444 comprising of 16 pairs and 6 trios in total.

445

446 Using the phylogeny constructed from the consensus whole genome sequences of all 206  
447 viruses, Phydelity was able identify 20 of the 22 high-quality transmission clusters as distinct  
448 clusters (Supplementary Figure 5). Applying the same metrics used to assess clustering  
449 performance of the simulated dataset earlier and using the high-quality transmission cluster  
450 labels as ground truth, Phydelity was able to produce highly pure clusters (97.8%), with a low  
451 probability of misclassification ( $I_G = 0.022$ ) and good accuracy ( $ARI = 0.962$ ), even after  
452 accounting for the number of predicted clusters ( $NMI = 0.993$ ; Table 2). As transmission  
453 events defined by McCrone et al. were based on highly conservative criteria imposed on deep  
454 sequencing datasets, Phydelity, which operates at the consensus sequence level, could also  
455 cluster viruses that did not satisfy these constraints but were still linked epidemiologically by  
456 their household identities. As such, Phydelity's clustering results were assessed based on the  
457 household association of the clustered individuals as well, yielding slightly diminished but  
458 nonetheless high quality performance (Purity = 0.894,  $I_G = 0.081$ ,  $ARI = 0.791$ ,  $NMI =$   
459 0.964; Supplementary Figure 5 and Table 2).

460

| Basis                              | $n_{sample}$ | $\%_{trans}$ | <i>Purity</i> | $I_G$       | <i>ARI</i>  | <i>NMI</i>  |
|------------------------------------|--------------|--------------|---------------|-------------|-------------|-------------|
|                                    | <b>All</b>   |              | <b>0.98</b>   | <b>0.02</b> | <b>0.96</b> | <b>0.99</b> |
| High-quality transmission clusters | 52           | 25%          | 0.87          | 0.06        | 0.72        | 0.93        |
|                                    |              | 45%          | 0.87          | 0.04        | 0.74        | 0.95        |
|                                    |              | 70%          | 0.85          | 0.07        | 0.76        | 0.94        |
|                                    | 93           | 25%          | 0.94          | 0.03        | 0.88        | 0.98        |
|                                    |              | 45%          | 0.94          | 0.03        | 0.90        | 0.98        |
|                                    |              | <b>All</b>   | <b>0.89</b>   | <b>0.08</b> | <b>0.79</b> | <b>0.96</b> |
| Household                          | 52           | 25%          | 0.56          | 0.29        | 0.35        | 0.82        |
|                                    |              | 45%          | 0.73          | 0.16        | 0.56        | 0.90        |
|                                    |              | 70%          | 0.82          | 0.11        | 0.74        | 0.93        |
|                                    | 93           | 25%          | 0.75          | 0.16        | 0.64        | 0.92        |
|                                    |              | 45%          | 0.87          | 0.11        | 0.80        | 0.95        |

461 **Table 2:** Clustering performance of Phydely on seasonal A/H3N2 influenza viruses collected by McCrone et  
462 al. (2018). Ground truth used for clustering assessment is either based on the identities of genetically-validated,  
463 high-quality transmission clusters as defined by McCrone et al. or by the patients' households. Besides  
464 analysing all of the viruses collected (bolded results), Phydely was also applied to downsampled datasets  
465 consisting of different sample size ( $n_{sample}$ ) and proportion of sequences derived from the aforementioned  
466 high-quality transmission pairs ( $\%_{trans}$ ). Adjusted rand index (*ARI*) measures how accurate the output clusters  
467 corresponded with the ground truth labels. *Purity* gives the average extent clusters contain only a single class.  
468 Modified Gini index ( $I_G$ ) is the probability that a randomly selected sequence would be incorrectly clustered.  
469 Normalised mutual information (*NMI*) accounts for the trade-off between clustering quality and number of  
470 clusters.

471

472 The full A/H3N2 sequence dataset was then randomly sampled to smaller pools of 52 (25%)  
473 as well as 93 (45%) isolates to assess how low sampling rates might affect Phydely's  
474 performance. To ensure that sequences involved in high-quality transmission pairs were also  
475 sampled, such isolates would constitute different proportions (either 25% or 45%; as well as  
476 70% for pools of 52 sequences only) of the downsampled datasets. 10 distinct downsamples  
477 were generated for each sample size/high-quality transmission sequence combination and the  
478 average results were tabulated (Table 2).

479

480 As the *MPL* is informed by the phylogenetic tree, clustering results will consequently be  
481 sensitive to the diversity of closely-related tips within the input phylogeny. Specifically, the  
482 closely-related sequences that constitute the  $k$ -th core patristic distance distribution ( $\mathcal{D}_k$ ) must  
483 be homogenous (i.e. similar difference between consecutive distances when  $\mathcal{D}_k$  is sorted; see  
484 Methods) but sufficiently distinct from the background diversity of the phylogeny. This was  
485 demonstrated by the improved clustering results with respect to household identities with

486 greater proportional inclusion of genetically similar, high-quality transmission pairs in the  
487 downsampled dataset (Table 2). Furthermore, erroneous clustering of distantly-related tips  
488 can be obtained if  $\mathcal{D}_k$  has a similar distance distribution relative to the entire tree due to  
489 insufficient divergence information from reduced sampling. This is evident from the general  
490 decrease in the clustering performance of all downsampled data. In particular, clustering  
491 closely-related, high-quality transmission clusters was worse off with a lower sample size.

492

#### 493 *Computational performance*

494 For computational performance, Phydelyity can process a phylogeny of 1000 tips, on an  
495 Ubuntu 16.04 LTS operating system with an Intel Core i7-4790 3.60 GHz CPU, in ~3  
496 minutes using a single CPU core and 253 MB of peak memory usage.

497

#### 498 **Discussion**

499 Phydelyity is a statistically-principled tool capable of identifying putative transmission clusters  
500 from pathogen phylogenies without the need to introduce arbitrary distance thresholds.

501 Instead, Phydelyity infers the maximal patristic distance limit (*MPL*) for cluster designation  
502 using the pairwise patristic distance distribution of closely-related tips in the input  
503 phylogenetic tree. Unlike other cutpoint-based methods, Phydelyity does not assume clusters  
504 are strictly monophyletic and can identify paraphyletic clustering owing to its distal  
505 dissociation approach. For datasets that span extended periods of time, multiple introductions  
506 within the same contact network and concurrent onward transmissions to other communities  
507 can result in “nested” introduction events that would go undetected by monophyletic  
508 clustering (Barido-Sottani et al. 2018). By relaxing this assumption, not only can Phydelyity  
509 pick up these “nested” events, it tends to produce clusters that are purer with a lower chance  
510 of misclassification while excluding putative outlying tips that are exceedingly distant from  
511 the inferred cluster.

512

513 Even though there are algorithmic similarities between PhyCLIP (Han et al. 2019) and  
514 Phydelyity, clustering results generated by PhyCLIP should not be interpreted as sequences  
515 linked by transmission events. For instance, when applied to the HCV genotype 1a NS5B  
516 dataset, PhyCLIP clustered 131 of the 155 input sequences into seven clades, all of which  
517 encompasses genetically similar viruses of both MSM and non-MSM origins that were  
518 endemic in Lyon during a specific period in time. In contrast, Phydelyity assigned 73

519 sequences into 12 transmission pairs and 5 transmission clusters that distinguished the  
520 underlying MSM transmission events from non-MSM ones (Supplementary Figure 1). A  
521 detailed comparison between Phydelity and PhyCLIP can be found in Supplementary  
522 Materials.

523

524 One of the key assumptions made by Phydelity is that the transmitted pathogens coalesce to  
525 the same most recent common ancestor (MRCA) and that the pairwise genetic distance of  
526 internal nodes found between the MRCA and the tips of the cluster to be bounded below  
527 *MPL*. While Phydelity does not explicitly equate the inferred phylogeny to a transmission  
528 tree, imposing a distance threshold between the internal nodes within a phylogenetic cluster  
529 may be construed as an implicit assumption that the internal nodes are representative of  
530 transmission events. There are important differences in the interpretation of phylogenetic and  
531 transmission trees. The former depicts the shared ancestry between the sampled tips while the  
532 latter represents the true transmission history between the transmitted pathogens (Pybus and  
533 Rambaut 2009; Ypma et al. 2013). It should be noted that Phydelity neither attributes any  
534 interpretation of transmission events to the internal nodes nor does it relate branch lengths of  
535 the phylogenetic tree, which correlate with the timing of coalescence, to transmission times.  
536 Restricting the distances between internal nodes below the *MPL* is strictly meant to increase  
537 conservatism in identifying clusters that are as closely-related as possible.

538

539 There have also been criticisms that non-parametric cluster identification by genetic  
540 similarity is biased towards the detection of recent infections as opposed to discerning  
541 variations in transmission rates between different subpopulations, which can be further  
542 exacerbated by oversampling (Poon 2016; Dearlove et al. 2017; Le Vu et al. 2018). While  
543 this caveat limits the interpretation of the inferred transmission clusters, it does not render all  
544 phylogenetic clustering tools obsolete. Phylogenetic clustering tools supplemented by  
545 epidemiological meta-data can still be used to systematically identify infection trends,  
546 potential risk factors and target subpopulations, as demonstrated by multiple epidemiological  
547 studies of different measurably-evolving pathogens (Matsuo et al. 2017; de Oliveira et al.  
548 2017; Charre et al. 2018).

549

550 Additionally, constructing a phylogenetic tree can be a computational bottleneck for large  
551 sequence datasets. As an alternative, genetic distance-based clustering algorithms such as

552 HIV-TRACE (Kosakovsky Pond et al. 2018) which negate the need to build a phylogenetic  
553 tree have becoming increasingly popular. However, HIV-TRACE still requires users to  
554 specify an arbitrary absolute distance threshold. Additionally, while it performed better than  
555 other existing phylogenetic clustering methods, HIV-TRACE did not preclude problems with  
556 bias towards higher sampling rates (Poon 2016).

557

558 Despite its limitations, clustering results generated by Phydelyty for the simulation and  
559 empirical datasets in this study demonstrate its superior performance over current widely  
560 used phylogenetic clustering methods. Importantly, Phydelyty obviates the need for users to  
561 define or optimise non-biologically-informed distance thresholds. Phydelyty is fast,  
562 generalisable, and freely available at <https://github.com/alvinxhan/Phydelyty>.

563

#### 564 **Acknowledgements**

565 We would like to thank Frits Scholer for his assistance with optimising Phydelyty, as well as  
566 Jelle Koopsen and Velislava Petrova for their intellectual contributions.

567

#### 568 **Data availability**

569 Phydelyty is freely available on <https://github.com/alvinxhan/Phydelyty>. All simulated  
570 datasets were downloaded from Villandre et al. (2016). Genbank accession numbers of HBV  
571 polymerase sequences: AB212625, GQ924626, AB115551, LC57377-LC57378, LC60789-  
572 LC60790, LC63767, LC64366-LC64378, LC64380-LC64381, LC80779-LC80783,  
573 LC80785, LC80787-LC80800, and LC80802-LC80804. Genbank accession numbers of  
574 HCV NS5B sequences: AF9606, EF407457, HQ850279, EU392172, FJ462437, DQ418786,  
575 M62321, MH885654-MH885777, and KY928311-KY928401. The A/H3N2 influenza virus  
576 consensus sequences were downloaded from

577 [https://github.com/lauringlab/Host\\_level\\_IAV\\_evolution](https://github.com/lauringlab/Host_level_IAV_evolution). Jupyter notebooks used to analyse  
578 both simulated and empirical datasets can be downloaded from

579 <https://github.com/alvinxhan/Phydelyty/tree/master/manuscript>.

580

#### 581 **Funding**

582 A.X.H. was supported by the A\*STAR Graduate Scholarship programme from A\*STAR to  
583 carry out his PhD work via collaboration between Bioinformatics Institute (A\*STAR) and  
584 NUS Graduate School for Integrative Sciences and Engineering from the National University

585 of Singapore. E.P. was funded by the Gates Cambridge Trust (Grant number: OPP1144).  
586 S.M.S. was supported by the A\*STAR HEIDI programme (Grant number: H1699f0013) and  
587 Bioinformatics Institute (A\*STAR).

588

## 589 **References**

590 Aldous JL, Pong SK, Poon A, Jain S, Qin H, Kahn JS, Kitahata M, Rodriguez B, Dennis AM,  
591 Boswell SL, et al. 2012. Characterizing HIV Transmission Networks Across the United  
592 States. *Clin. Infect. Dis.* 55(8):1135–1143.

593 Ambrosioni J, Junier T, Delhumeau C, Calmy A, Hirschel B, Zdobnov E, Kaiser L, Yerly S,  
594 Study the SHIVC. 2012. Impact of highly active antiretroviral therapy on the molecular  
595 epidemiology of newly diagnosed HIV infections. *AIDS* 26(16):2079–2086.

596 Barido-Sottani J, Vaughan TG, Stadler T. 2018. Detection of HIV transmission clusters from  
597 phylogenetic trees using a multi-state birth–death model. *J. R. Soc. Interface* 15(146).

598 Bartlett SR, Jacka B, Bull RA, Luciani F, Matthews G V., Lamoury FMJ, Hellard ME,  
599 Hajarizadeh B, Teutsch S, White B, et al. 2016. HIV infection and hepatitis C virus genotype  
600 1a are associated with phylogenetic clustering among people with recently acquired hepatitis  
601 C virus infection. *Infect. Genet. Evol.* 37:252–258.

602 Bezemer D, Cori A, Ratmann O, van Sighem A, Hermanides HS, Dutilh BE, Gras L,  
603 Rodrigues Faria N, van den Hengel R, Duits AJ, et al. 2015. Dispersion of the HIV-1  
604 Epidemic in Men Who Have Sex with Men in the Netherlands: A Combined Mathematical  
605 Model and Phylogenetic Analysis. *PLOS Med.* 12(11):e1001898.

606 Breiman L, Friedman J, Stone CJ, Olshen RA. 1984. *Classification and regression trees*.  
607 Florida.

608 Brenner BG, Roger M, Routy J-P, Moisi D, Ntemgwa M, Matte C, Baril J-G, Thomas R,  
609 Rouleau D, Bruneau J, et al. 2007. High Rates of Forward Transmission Events after  
610 Acute/Early HIV-1 Infection. *J. Infect. Dis.* 195(7):951–959.

611 Campbell F, Strang C, Ferguson N, Cori A, Jombart T. 2018. When are pathogen genome  
612 sequences informative of transmission events? *PLOS Pathog.* 14(2):e1006885.

613 Charre C, Cotte L, Kramer R, Miaillhes P, Godinot M, Koffi J, Scholtès C, Ramière C. 2018.  
614 Hepatitis C virus spread from HIV-positive to HIV-negative men who have sex with men.  
615 *PLoS One* 13(1):e0190340.

616 Coll F, Harrison EM, Toleman MS, Reuter S, Raven KE, Blane B, Palmer B, Kappeler ARM,  
617 Brown NM, Török ME, et al. 2017. Longitudinal genomic surveillance of MRSA in the UK  
618 reveals transmission patterns in hospitals and the community. *Sci. Transl. Med.*  
619 9(413):eaak9745.

620 Dearlove BL, Xiang F, Frost SDW. 2017. Biased phylodynamic inferences from analysing  
621 clusters of viral sequences. *Virus Evol.* 3(2):vex020.



- 622 Gardy JL, Loman NJ. 2017. Towards a genomics-informed, real-time, global pathogen  
623 surveillance system. *Nat. Rev. Genet.* 19(1):9–20.
- 624 Grabowski MK, Redd AD. 2014. Molecular tools for studying HIV transmission in sexual  
625 networks. *Curr. Opin. HIV AIDS* 9(2):126–133.
- 626 Han AX, Parker E, Scholer F, Maurer-Stroh S, Russell CA. 2019. Phylogenetic Clustering by  
627 Linear Integer Programming (PhyCLIP). *Mol. Biol. Evol.* 36(7):1580–1595.
- 628 Hubert L, Arabie P. 1985. Comparing partitions. *J. Classif.* 2(1):193–218.
- 629 Jacka B, Applegate T, Krajden M, Olmstead A, Harrigan PR, Marshall BDL, DeBeck K,  
630 Milloy M-J, Lamoury F, Pybus OG, et al. 2014. Phylogenetic clustering of hepatitis C virus  
631 among people who inject drugs in Vancouver, Canada. *Hepatology* 60(5):1571–1580.
- 632 Kosakovsky Pond SL, Weaver S, Leigh Brown AJ, Wertheim JO. 2018. HIV-TRACE  
633 (TRANsmission Cluster Engine): A tool for large scale molecular epidemiology of HIV-1 and  
634 other rapidly evolving pathogens. *Mol. Biol. Evol.* 35(7):1812–1819.
- 635 Manning CD, Raghavan P, Schütze H. 2008. *Introduction to Information Retrieval*. New  
636 York, NY, USA: Cambridge University Press
- 637 Matsuo J, Do SH, Yamamoto C, Nagashima S, Chuon C, Katayama K, Takahashi K, Tanaka  
638 J. 2017. Clustering infection of hepatitis B virus genotype B4 among residents in Vietnam,  
639 and its genomic characters both intra- and extra-family. *PLoS One* 12(7):e0177248.
- 640 McCrone JT, Woods RJ, Martin ET, Malosh RE, Monto AS, Luring AS. 2018. Stochastic  
641 processes constrain the within and between host evolution of influenza virus. *Elife* 7:e35962.
- 642 de Oliveira T, Kharsany ABM, Gräf T, Cawood C, Khanyile D, Grobler A, Puren A, Madurai  
643 S, Baxter C, Karim QA, et al. 2017. Transmission networks and risk of HIV infection in  
644 KwaZulu-Natal, South Africa: a community-wide phylogenetic study. *Lancet HIV* 4(1):e41–  
645 e50.
- 646 Poon AFY. 2016. Impacts and shortcomings of genetic clustering methods for infectious  
647 disease outbreaks. *Virus Evol.* 2(2):vew031.
- 648 Prosperi MCFF, Ciccozzi M, Fanti I, Saladini F, Pecorari M, Borghi V, Di Giambenedetto S,  
649 Bruzzone B, Capetti A, Vivarelli A, et al. 2011. A novel methodology for large-scale  
650 phylogeny partition. *Nat. Commun.* 2:321.
- 651 Pybus OG, Rambaut A. 2009. Evolutionary analysis of the dynamics of viral infectious  
652 disease. *Nat. Rev. Genet.* 10(8):540–550.
- 653 Ragonnet-Cronin M, Hodcroft E, Hué S, Fearnhill E, Delpéch V, Brown AJL, Lycett S.  
654 2013. Automated analysis of phylogenetic clusters. *BMC Bioinformatics* 14(1):317.
- 655 Rousseeuw PJ. 1987. Silhouettes: A graphical aid to the interpretation and validation of  
656 cluster analysis. *J. Comput. Appl. Math.* 20:53–65.
- 657 Rousseeuw PJ, Croux C. 1993. Alternatives to the Median Absolute Deviation. *J. Am. Stat.*

- 658 Assoc. 88(424):1273–1283.
- 659 Stamatakis A. 2014. RAxML version 8: a tool for phylogenetic analysis and post-analysis of  
660 large phylogenies. *Bioinformatics* 30(9):1312–1313.
- 661 Villandre L, Stephens DA, Labbe A, Günthard HF, Kouyos R, Stadler T, Study TSHIVC.  
662 2016. Assessment of Overlap of Phylogenetic Transmission Clusters and Communities in  
663 Simple Sexual Contact Networks: Applications to HIV-1. *PLoS One* 11(2):e0148459.
- 664 Volk JE, Marcus JL, Phengrasamy T, Hare CB. 2015. Incident Hepatitis C Virus Infections  
665 Among Users of HIV Preexposure Prophylaxis in a Clinical Practice Setting. *Clin. Infect.  
666 Dis.* 60(11):1728–1729.
- 667 Le Vu S, Ratmann O, Delpech V, Brown AE, Gill ON, Tostevin A, Fraser C, Volz EM.  
668 2018. Comparison of cluster-based and source-attribution methods for estimating  
669 transmission risk using large HIV sequence databases. *Epidemics* 23:1–10.
- 670 Ypma RJF, van Ballegooijen WM, Wallinga J. 2013. Relating phylogenetic trees to  
671 transmission trees of infectious disease outbreaks. *Genetics* 195(3):1055–1062.
- 672
